# Supplementary material for: Adverse Mentions, Negative Sentiment, and Emotions in COVID-19 Vaccine Tweets and Their Association with Vaccination Uptake: Global Comparison of 192 Countries
Source: MDPI journal article supplement (doi:10.3390/vaccines10050735), 2022-05-08
Supplement: s1 [file s1]

**Supplementary Table S1. Sample Countries and Adverse Mentions, Negative Sentiment, and Emotions in COVID-19 Vaccine Tweets**

| Countries              | COVID19 vaccine tweets | Negative sentiment | Fear/sadness /anger | Death mention | Side effects mention | Blood clots mention |
|------------------------|------------------------|--------------------|---------------------|---------------|----------------------|---------------------|
| Afghanistan            | 2,353                  | .04                | .24                 | .93           | .68                  | .76                 |
| Albania                | 653                    | .15                | .55                 | .99           | 1.38                 | 1.84                |
| Algeria                | 3,673                  | .03                | .39                 | 1.14          | .73                  | .19                 |
| Andorra                | 141                    | .71                | .45                 | 2.84          | .71                  | 2.13                |
| Angola                 | 1,119                  | .09                | .65                 | 3.04          | .36                  | .18                 |
| Antigua and Barbuda    | 683                    | .15                | 1.48                | 1.90          | .44                  | .88                 |
| Argentina              | 314,804                | .00                | .49                 | 1.55          | .53                  | .13                 |
| Armenia                | 159                    | .66                | .67                 | 3.14          | 2.51                 | 1.26                |
| Australia              | 301,723                | .00                | 1.65                | 2.42          | 1.36                 | 2.05                |
| Austria                | 17,042                 | .01                | .88                 | 21.62         | 2.73                 | 1.40                |
| Azerbaijan             | 655                    | .15                | .42                 | 1.53          | 1.68                 | .31                 |
| Bahamas                | 3,069                  | .03                | .75                 | 1.53          | 1.24                 | 1.69                |
| Bahrain                | 4,060                  | .02                | .55                 | 1.01          | 1.01                 | .54                 |
| Bangladesh             | 13,644                 | .01                | .56                 | 1.42          | .79                  | .60                 |
| Barbados               | 2,528                  | .04                | 1.05                | 1.19          | 1.34                 | .79                 |
| Belarus                | 1,602                  | .06                | .49                 | 1.50          | .56                  | .44                 |
| Belgium                | 46,449                 | .00                | .74                 | 3.43          | 1.95                 | 1.13                |
| Belize                 | 1,035                  | .10                | .65                 | 1.45          | .77                  | .58                 |
| Benin                  | 1,311                  | .07                | .18                 | .15           | 1.20                 | 0                   |
| Bhutan                 | 716                    | .14                | .38                 | 1.12          | .28                  | .14                 |
| Bolivia                | 15,675                 | .01                | .40                 | .80           | .50                  | .12                 |
| Bosnia and Herzegovina | 509                    | .20                | .78                 | 2.36          | .59                  | 1.77                |
| Botswana               | 4,501                  | .02                | 1.02                | 1.91          | .82                  | .62                 |
| Brazil                 | 1,411,131              | .00                | .61                 | 2.42          | .46                  | .07                 |
| Brunei                 | 585                    | .17                | 1                   | .68           | .51                  | .51                 |
| Bulgaria               | 1,631                  | .06                | .65                 | 1.47          | 1.47                 | 1.53                |
| Burkina Faso           | 875                    | .11                | 1.12                | .69           | 1.6                  | .11                 |
| Burma (Myanmar)        | 6,479                  | .02                | 1.60                | .59           | .77                  | .34                 |
| Burundi                | 433                    | .24                | .89                 | .92           | 4.16                 | .69                 |
| Cambodia               | 2,206                  | .05                | .56                 | 1.13          | 0                    | .54                 |

|                          |           |      |      |      |      |      |
|--------------------------|-----------|------|------|------|------|------|
| Cameroon                 | 6,454     | .02  | .64  | 1    | .91  | .84  |
| Canada                   | 1,457,298 | .00  | .99  | 1.68 | 1.06 | 1    |
| Cape Verde               | 331       | .30  | .03  | .60  | .30  | .30  |
| Central African Republic | 293       | .34  | .78  | 1.78 | 1.02 | 2.39 |
| Chad                     | 220       | .45  | .71  | 2.27 | 1.36 | .45  |
| Chile                    | 158,213   | .00  | .46  | 1.96 | .60  | .19  |
| China                    | 17,572    | .01  | 1.06 | 2.49 | .95  | .90  |
| Colombia                 | 322,557   | .00  | .38  | 1.45 | .49  | .13  |
| Comoros                  | 25        | 4    | .00  | 0    | 4    | 0    |
| Congo, Dem. Rep. of      | 7,189     | .01  | .47  | 1.11 | 1.07 | .26  |
| Congo, Rep. of           | 684       | .15  | .37  | .88  | 3.07 | .15  |
| Costa Rica               | 23,536    | .00  | .70  | 1.18 | .24  | .24  |
| Croatia                  | 1,718     | .06  | .68  | 2.21 | .41  | 1.51 |
| Cte d'Ivoire             | 3,338     | .03  | .26  | .90  | 1.62 | .33  |
| Cuba                     | 28,729    | .00  | .63  | 1.38 | .23  | .15  |
| Cyprus                   | 1,248     | .08  | .77  | .96  | .96  | 2.88 |
| Czech Republic           | 8,185     | .01  | .83  | .96  | 1.34 | 1.11 |
| Denmark                  | 14,022    | .01  | .90  | 2.97 | 3.39 | 1.90 |
| Djibouti                 | 420       | .24  | .44  | .95  | 1.43 | .48  |
| Dominica                 | 148       | .68  | .39  | 1.35 | 1.35 | 0    |
| Dominican Republic       | 50,347    | .00  | .56  | 1.07 | .60  | .18  |
| East Timor (Timor-Leste) | 98        | 1.02 | .29  | 4.08 | 0    | 1.02 |
| Ecuador                  | 139,235   | .00  | .41  | 1.01 | .68  | .21  |
| Egypt                    | 11,305    | .01  | .73  | 1.14 | 1.04 | 1.20 |
| El Salvador              | 46,634    | .00  | .54  | .78  | .62  | .21  |
| Equatorial Guinea        | 256       | .39  | .82  | 1.56 | .78  | 3.52 |
| Eritrea                  | 63        | 1.59 | 1.63 | 1.59 | 0    | 0    |
| Estonia                  | 1,354     | .07  | .73  | 1.85 | 1.70 | 1.11 |
| Ethiopia                 | 2,759     | .04  | .47  | 1.64 | .72  | .83  |
| Fiji                     | 6,826     | .01  | .50  | 1.60 | .86  | .56  |
| Finland                  | 11,912    | .01  | 1.00 | 2.03 | 1.56 | 1.28 |
| France                   | 581,072   | .00  | .71  | 1.96 | 2    | .23  |

|               |           |      |      |       |      |      |
|---------------|-----------|------|------|-------|------|------|
| Gabon         | 1,793     | .06  | .14  | 1.00  | 1.23 | .06  |
| Gambia        | 1,689     | .06  | .28  | 1.72  | .89  | 1.30 |
| Georgia       | 745       | .13  | .44  | .81   | 1.61 | .54  |
| Germany       | 132,112   | .00  | .79  | 25.59 | 3.47 | .76  |
| Ghana         | 43,106    | .00  | .47  | 1.61  | 1.81 | .70  |
| Greece        | 23,127    | .00  | .74  | 1.28  | 1.43 | 1.40 |
| Grenada       | 433       | .23  | 1.05 | .92   | 1.85 | 2.08 |
| Guatemala     | 40,414    | .00  | .45  | 1.12  | .69  | .16  |
| Guinea        | 1,370     | .07  | .18  | .80   | 1.53 | .15  |
| Guinea-Bissau | 40        | 2.5  | 0    | 0     | 0    | 0    |
| Guyana        | 1,614     | .06  | .65  | 1.61  | 1.12 | 1.67 |
| Haiti         | 2,493     | .04  | .83  | .88   | 1.33 | .36  |
| Honduras      | 22,963    | .00  | .39  | .81   | .60  | .18  |
| Hungary       | 2,702     | .04  | 1.09 | 2.22  | 1.85 | 1.15 |
| Iceland       | 1,372     | .07  | 1.36 | 2.40  | 2.48 | 1.24 |
| India         | 1,946,449 | .00  | .69  | 2.34  | .59  | .28  |
| Indonesia     | 660,361   | .00  | .86  | 2.11  | .91  | .08  |
| Iran          | 7,620     | .01  | 1.50 | 3.20  | .81  | .59  |
| Iraq          | 4,968     | .02  | .61  | 1.02  | .91  | .80  |
| Ireland       | 126,445   | .00  | .91  | 2.06  | 1.17 | 1.06 |
| Israel        | 9,530     | .01  | 1.18 | 2.10  | 1.28 | .60  |
| Italy         | 91,143    | .00  | .64  | 2.11  | 1.77 | 1.19 |
| Jamaica       | 22,253    | .00  | .71  | 1.63  | 1.18 | 1.63 |
| Japan         | 545,845   | .00  | .56  | 12.90 | 2.92 | .34  |
| Jordan        | 4,312     | .02  | .63  | 1.16  | 1.02 | .95  |
| Kazakhstan    | 604       | .17  | .54  | .99   | .66  | .17  |
| Kenya         | 96,610    | .00  | 1.02 | 1.87  | 1.31 | 1.21 |
| Kiribati      | 58        | 1.72 | .27  | 0     | 0    | 1.72 |
| Korea, North  | 0         | 0    | 0    | 0     | 0    | 0    |
| Korea, South  | 22,620    | .00  | .73  | 1.18  | 1.60 | 1.46 |
| Kuwait        | 22,111    | .00  | .69  | 1.01  | 1.49 | 1.10 |
| Kyrgyzstan    | 529       | .19  | .31  | .38   | .57  | .19  |
| Laos          | 222       | .45  | .22  | .45   | 2.70 | .45  |
| Latvia        | 3,297     | .03  | .57  | 1.91  | 1.67 | 1.94 |
| Lebanon       | 7,871     | .01  | 1.00 | 1.19  | 2.36 | 1.00 |
| Lesotho       | 1,054     | .09  | .86  | 3.13  | .76  | 2.47 |

|                             |         |      |      |       |      |      |
|-----------------------------|---------|------|------|-------|------|------|
| Liberia                     | 571     | .18  | .49  | 1.23  | 1.05 | .18  |
| Libya                       | 1,206   | .08  | .84  | .83   | 1.33 | 1.08 |
| Liechtenstein               | 235     | .43  | 1.17 | 10.64 | 1.70 | .43  |
| Lithuania                   | 569     | .17  | .52  | 1.05  | 1.75 | .53  |
| Luxembourg                  | 1,748   | .06  | .90  | 2.17  | .91  | .91  |
| Macedonia (North Macedonia) | 1,174   | .08  | .86  | 2.89  | 3.23 | 1.36 |
| Madagascar                  | 1,015   | .09  | .42  | 1.18  | 1.28 | .29  |
| Malawi                      | 3,670   | .02  | .81  | 1.14  | .981 | 1.03 |
| Malaysia                    | 133,999 | .00  | .75  | 2.26  | 1.60 | 1.18 |
| Maldives                    | 12,066  | .01  | .22  | .72   | 1.26 | 1.04 |
| Mali                        | 1,109   | .09  | .83  | 1.53  | .99  | .18  |
| Malta                       | 3,036   | .03  | .48  | 1.08  | 1.09 | 1.02 |
| Marshall Islands            | 1       | 0    | 0    | 0     | 0    | 0    |
| Mauritania                  | 155     | .64  | .90  | .64   | 0    | 0    |
| Mauritius                   | 1,124   | .08  | .81  | 1.69  | 1.87 | 2.22 |
| Mexico                      | 774,267 | .00  | .56  | .88   | .59  | .13  |
| Micronesia                  | 48      | 2.08 | .33  | 4.16  | 0    | 0    |
| Moldova                     | 302     | .33  | .44  | 1.32  | .66  | .66  |
| Monaco                      | 2,107   | .05  | 1.32 | 1.94  | 1.99 | .71  |
| Mongolia                    | 4,097   | .02  | .44  | 1.00  | 1.22 | 1.22 |
| Montenegro                  | 349     | .28  | .85  | 1.71  | .57  | 2.29 |
| Morocco                     | 3,290   | .03  | .52  | 1.09  | .85  | .76  |
| Mozambique                  | 1,342   | .07  | .47  | 1.86  | .52  | .15  |
| Namibia                     | 7,138   | .01  | 1.86 | 4.90  | 1.43 | .81  |
| Nauru                       | 14      | 7.14 | .5   | 0     | 0    | 0    |
| Nepal                       | 10,819  | .01  | .78  | 1.58  | .85  | .57  |
| Netherlands                 | 81,218  | .00  | 1.01 | 10.68 | 3.46 | 1.08 |
| New Zealand                 | 30,964  | .00  | 1.13 | 1.87  | 1.15 | .95  |
| Nicaragua                   | 25,417  | .00  | .71  | .41   | .22  | .06  |
| Niger                       | 359     | .28  | .14  | .56   | .83  | .28  |
| Nigeria                     | 218,725 | .00  | .76  | 1.43  | 1.43 | .92  |
| Norway                      | 9,206   | .01  | 1.09 | 2.49  | 1.86 | 2.12 |
| Oman                        | 5,697   | .01  | .66  | .56   | .77  | .82  |

|                            |         |      |      |      |      |      |
|----------------------------|---------|------|------|------|------|------|
| Pakistan                   | 79,806  | .00  | .59  | 1.14 | 1.08 | .76  |
| Palau                      | 62      | 1.61 | 1.12 | 0    | 0    | 1.61 |
| Panama                     | 48,008  | .00  | .76  | 1.37 | .74  | .35  |
| Papua New Guinea           | 1,301   | .07  | .83  | 1.22 | 1.15 | 1.76 |
| Paraguay                   | 56,770  | .00  | .32  | 1.27 | .47  | .20  |
| Peru                       | 261,516 | .00  | .39  | 1.73 | .27  | .08  |
| Philippines                | 172,958 | .00  | .98  | 1.00 | 1.07 | .62  |
| Poland                     | 33,943  | .00  | .67  | 1.67 | 1.25 | .92  |
| Portugal                   | 63,586  | .00  | .54  | 2.84 | .46  | .44  |
| Qatar                      | 11,981  | .00  | .74  | .80  | .91  | .44  |
| Romania                    | 6,566   | .01  | .72  | 1.20 | 1.20 | .53  |
| Russia                     | 26,543  | .00  | 1.17 | 1.05 | .76  | .47  |
| Rwanda                     | 13,085  | .01  | .34  | 1.42 | .61  | 1.01 |
| Samoa                      | 279     | .36  | 1.52 | 2.50 | 1.43 | .71  |
| San Marino                 | 99      | 1.01 | .06  | 3.03 | 1.01 | 0    |
| Saudi Arabia               | 139,889 | .00  | .68  | .21  | .29  | .20  |
| Senegal                    | 6,835   | .01  | .30  | .64  | 1.08 | .20  |
| Serbia                     | 3,835   | .03  | 1.02 | 2.42 | 1.22 | 3.38 |
| Seychelles                 | 307     | .32  | .38  | .97  | 1.30 | .32  |
| Sierra Leone               | 986     | .10  | .67  | 1.52 | .61  | .60  |
| Singapore                  | 35,660  | .00  | .93  | 1.54 | 1.33 | .75  |
| Slovakia (Slovak Republic) | 765     | .13  | .69  | 2.22 | 2.61 | 1.30 |
| Slovenia                   | 2,347   | .04  | .96  | 3.19 | 3.2  | 2.3  |
| So Tom and Prncipe         | 0       | 0    | 0    | 0    | 0    | 0    |
| Solomon Islands            | 272     | .37  | .41  | .73  | 0    | 1.47 |
| Somalia                    | 2,515   | .04  | .38  | .83  | .76  | 1.03 |
| South Africa               | 181,671 | .00  | 1.54 | 3.15 | 1.42 | 1.35 |
| South Sudan                | 1,132   | .09  | .70  | 2.12 | 1.32 | .44  |
| Spain                      | 346,949 | .00  | .72  | 1.61 | 1.16 | .92  |
| Sri Lanka                  | 11,295  | .00  | .69  | 1.08 | .89  | .93  |
| St. Kitts and Nevis        | 378     | .26  | 0.5  | .26  | .26  | .26  |
| St. Lucia                  | 1,272   | .08  | .55  | 1.26 | .08  | 1.26 |

|                                 |           |      |      |      |      |      |
|---------------------------------|-----------|------|------|------|------|------|
| St. Vincent and the Grenadines  | 2,101     | .05  | .73  | .71  | 1.47 | .76  |
| Sudan                           | 1,330     | .08  | .44  | 1.73 | .61  | 1.12 |
| Suriname                        | 203       | .49  | .93  | 4.92 | 2.46 | 1.97 |
| Swaziland (Kingdom of Eswatini) | 500       | 0.2  | 1.5  | 4.2  | 1.6  | 2.8  |
| Sweden                          | 27,109    | .00  | .92  | 2.27 | 2.33 | 1.24 |
| Switzerland                     | 40,950    | .00  | .77  | 9.43 | 2.23 | .53  |
| Syria                           | 800       | .12  | .72  | 1.25 | 1.25 | .87  |
| Tajikistan                      | 79        | 1.26 | .06  | 0    | 0    | 0    |
| Tanzania                        | 6,654     | .02  | .63  | 2.24 | .96  | 1.36 |
| Thailand                        | 526,243   | .00  | .42  | 3.74 | 2.85 | 1.14 |
| Togo                            | 694       | .14  | .55  | .29  | 1.01 | 0    |
| Tonga                           | 402       | .25  | .73  | 3.48 | .99  | 0    |
| Trinidad and Tobago             | 17,117    | .01  | .83  | 2.22 | 1.05 | 1.26 |
| Tunisia                         | 1,522     | .07  | 1.01 | .92  | .92  | .26  |
| Turkey                          | 159,233   | .00  | .65  | 2.53 | 1.55 | .22  |
| Turkmenistan                    | 43        | 2.33 | 0.6  | 2.32 | 0    | 0    |
| Tuvalu                          | 31        | 3.22 | 1    | 0    | 0    | 0    |
| Uganda                          | 46,375    | .00  | .74  | 1.96 | .94  | .18  |
| Ukraine                         | 7,533     | .01  | 1.19 | 1.04 | .57  | .55  |
| United Arab Emirates            | 46,478    | .00  | .63  | 1.00 | .64  | .43  |
| United Kingdom                  | 1,630,589 | .00  | .83  | 2.04 | 1.19 | 1.06 |
| United States                   | 6,570,155 | .00  | .95  | 1.89 | 1.19 | .58  |
| Uruguay                         | 46,656    | .00  | .47  | 1.91 | .40  | .17  |
| Uzbekistan                      | 262       | .38  | .44  | 1.91 | 1.14 | 1.14 |
| Vanuatu                         | 128       | .78  | .6   | 3.13 | 1.56 | 0    |
| Venezuela                       | 401,783   | .00  | .47  | 1.35 | 1.64 | .16  |
| Vietnam                         | 8,814     | .01  | .73  | 1.62 | .77  | .78  |
| Yemen                           | 46,480    | .00  | .64  | 1.00 | .64  | .43  |
| Zambia                          | 3,343     | .03  | .86  | 2.45 | .92  | .20  |
| Zimbabwe                        | 18,030    | .01  | .68  | 1.67 | 1.11 | .57  |
